# Supplementary material for: Microbial community in buckwheat rhizosphere with different nitrogen application rates
Source: PeerJ. 2023 Jun 21;11:e15514. doi: 10.7717/peerj.15514 (PMC10290450; doi:10.7717/peerj.15514)
Supplement: Data S1 [file peerj-11-15514-s002.xlsx]

## Sheet: Sheet1
Raw data of chemical properties of the samples
Treatments	pH			Available nitrogen (mg/kg)			Total nitrogen (g/kg)
	replicate 1	replicate 2	replicate 3	replicate 1	replicate 2	replicate 3	replicate 1	replicate 2	replicate 3
N90	7.85	7.82	7.92	2.04	2.01	1.98	1.26	1.39	1.4
N120	7.83	7.87	7.86	1.98	2.07	2.03	1.33	1.45	1.36
N150	7.89	7.84	7.92	1.99	2.02	1.94	1.26	1.36	1.45
